# Supplementary material
Source: Springer Nature journal article supplement (https://www.springermedizin.de/resource/supplementary/12884_2009_295_MOESM4_ESM.pdf/9457396)
Supplement: MOESM4 [file 9457396]

# मातृ तथा नवशिशु स्याहार

बच्चा जन्मने अनुमानित महिना

वै जे अ सा भा आ का मं पौ मा फा चै

## गर्भावस्थामा गर्नुपर्ने आवश्यक तयारीहरू




१ स्वास्थ्य संस्थामा जाँच गर्नु पर्ने

२

३

४



जुकाको औषधी खाने



टि. टि. खोप लगाउने

महिना

|                                                                                    |                                                                                     |                                                                                     |                                                                                     |                                                                                     |                                                                                     |
|------------------------------------------------------------------------------------|-------------------------------------------------------------------------------------|-------------------------------------------------------------------------------------|-------------------------------------------------------------------------------------|-------------------------------------------------------------------------------------|-------------------------------------------------------------------------------------|
| चौथो                                                                               | पाँचौ                                                                               | छैठौ                                                                                | सातौ                                                                                | आठौ                                                                                 | नवौ                                                                                 |
|  |  |  |  |  |  |

गर्भावस्थामा आईरन चक्की खाने



गर्भावस्थामा पोषिलो खानेकुरा खाने



रक्सी चुरोट नखाने



आराम गर्ने र गह्रौ भारी नबोक्ने



पैसाको व्यवस्था गर्ने  
रू. ....

स्वास्थ्यकर्मीको पहिचान गर्ने

नाम: .....



स्वास्थ्य संस्थामा बच्चा जन्माउने तयारी गर्ने

नाम: .....



यातायातको साधनको तयारी गर्ने

सम्पर्क: .....

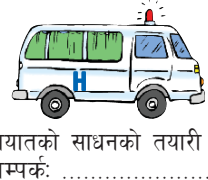

सुत्केरी सामग्री ल्याएर राख्ने



## जन्म विवरण

बच्चा जन्मेको मिति:  
गते ..... महिना ..... साल .....

## स्थान:



स्वास्थ्य संस्था



घर

## नवशिशुलाई जन्मने वित्तिकै गरिने अत्यावश्यक स्याहार



शिशुलाई नरम, सफा र सुख्खा कपडाले पुछ्ने



आमाको छातीमा टाँसेर राख्ने



शिशु जन्मेको १ घण्टा भित्रै आमाको विगौती दूध खुवाउने



नाभिमा केही पनि नलगाई सुख्खा र सफा राख्ने

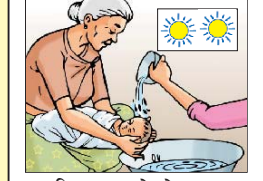

शिशु जन्मेको २४ घण्टापछि मात्र नुहाईदिने

## सुत्केरी स्याहार



आईरन चक्की खाने



भिटाभिन ए क्याप्सुल खाने



शिशुलाई सही तरिकाले स्तन पान गराईराख्ने



शिशुलाई खोप लगाउने

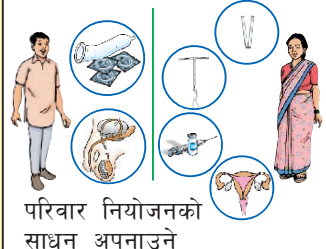

परिवार नियोजनको साधन अपनाउने
